# Supplementary material for: Ultraviolet light-induced collagen degradation inhibits melanoma invasion
Source: PubMed Central journal article supplement (PMC8115293; doi:10.1038/s41467-021-22953-z), 2021-05-12
Supplement: 41467_2021_22953_MOESM1_ESM.pdf [file 41467_2021_22953_MOESM1_ESM.pdf]

## Supplementary Information

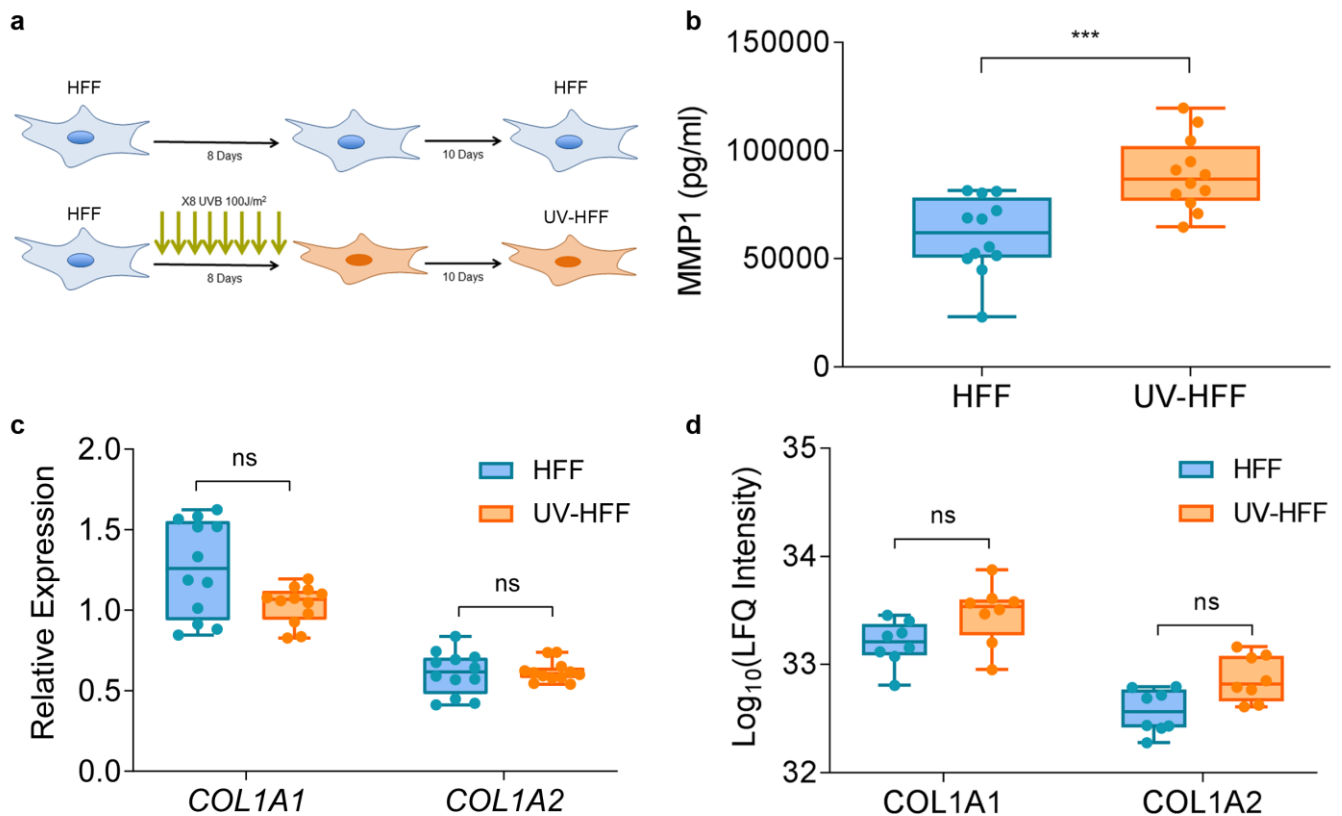

**Supplementary Figure 1. UVR damaged fibroblasts upregulate MMP1 but not COL1A1.** **a.** Graphic representation of the generation of isogenic HFF and UV-HFF by chronic UVR treatment. **b.** Quantification of MMP1 in the secretome of HFF and UV-HFF fibroblasts, (two-sided Mann Whitney U \*\*\* $p=0.0009$ ). **c.** Relative Expression of *COL1A1* and *COL1A2* in HFF and UV-HFF fibroblasts, (two-sided Mann Whitney U ns: not significant). **d.** Label free quantification (LfQ) of *COL1A1* AND *COL1A2* in the HFF and UV-HFF matrisome by mass spectrometry, (two-sided Mann Whitney U ns: not significant). All data represents duplicate samples collected from biological replicate cell lines, box plot showing biological and technical replicate points. box plots represent 25<sup>th</sup> to 75<sup>th</sup> percentiles with median, whiskers represent minimum and maximum values.

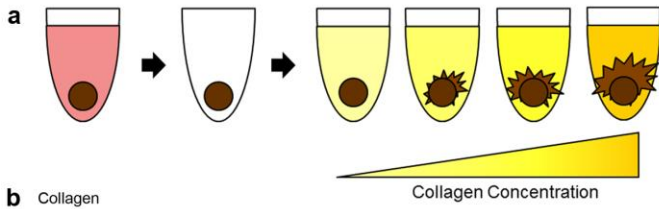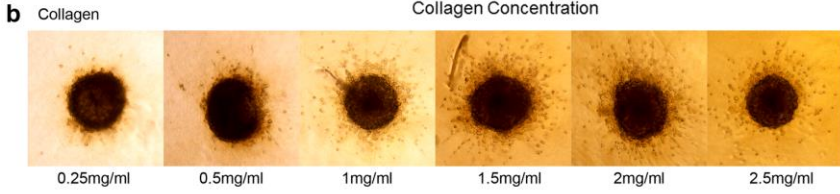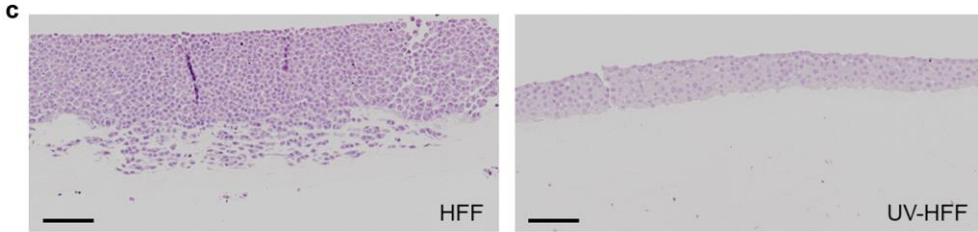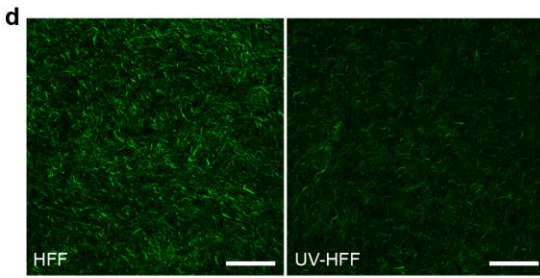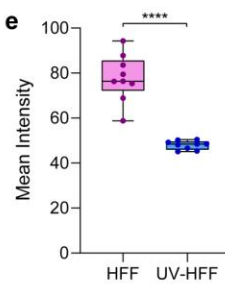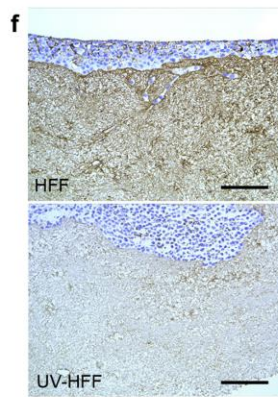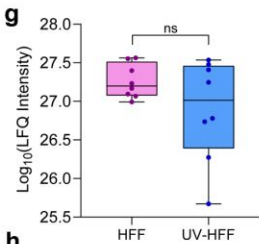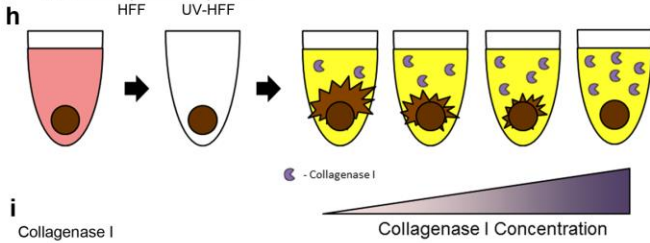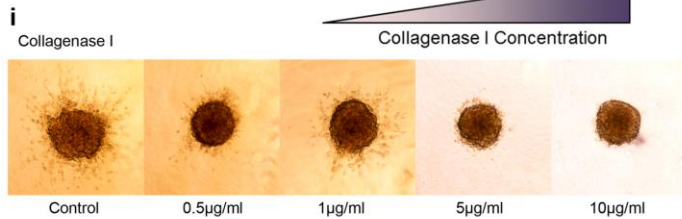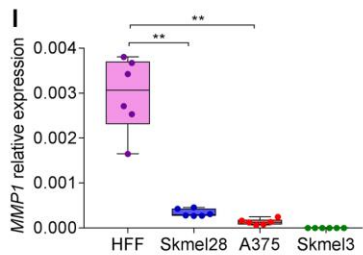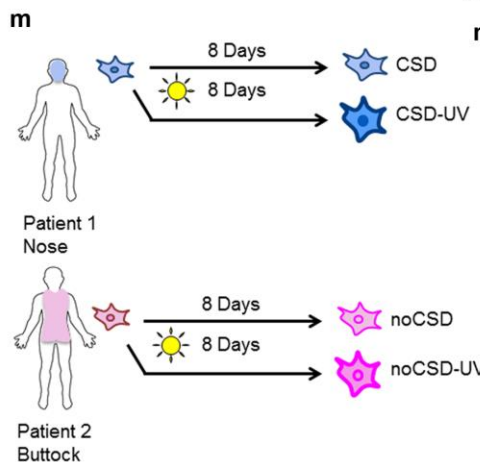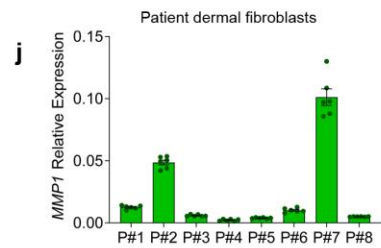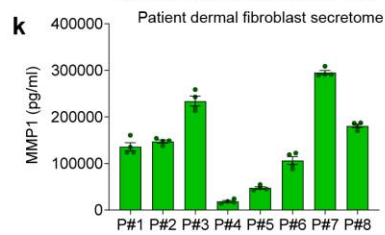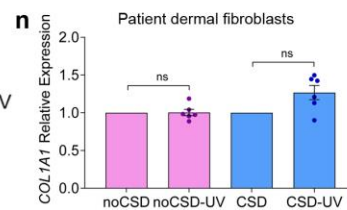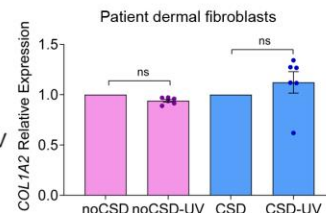

**Supplementary Figure 2. Melanoma invasion decreases in low amounts and degraded collagen**

**a.** Graphical representation of spheroid model of collagen concentration gradient. **b.** Representative Sk-mel-28 spheroid invasion in collagen gradient. **c.** Representative H&E photomicrographs of UV and UV-HFF constructs with melanoma cells, scale bar: 150  $\mu\text{m}$ . **d.** Second harmonic generation (SHG) imaging of collagen fibres in organotypic dermal collagen HFF and UV-HFF constructs, scale bar: 50  $\mu\text{m}$ . **e.** Quantification of collagen from SHG images in HFF and UV-HFF, (two-sided Mann Whitney U \*\*\*\* $p < 0.0001$ ). **f.** Fibronectin IHC staining in organotypic dermal collagen HFF and UV-HFF constructs, scale bars: 50  $\mu\text{m}$ . **g.** Label free quantification (LFQ) of elastin (ELN) in the HFF and UV-HFF matrix by mass spectrometry (two-sided Mann Whitney U ns: not significant). **h.** Graphical representation of spheroid model of collagenase I concentration gradient. **i.** Representative Sk-mel-28 spheroid invasion in collagenase I gradient. **j.** Relative expression of *MMP1* in panel of eight healthy adult dermal fibroblasts cell lines. **k.** Quantification of *MMP1* in the secretome of eight adult fibroblast cell lines. **l.** Relative expression of *MMP1* in melanoma cell lines (Sk-mel-28, A375, Sk-mel-3) compared to HFF fibroblasts, (two-sided Mann Whitney U \*\* $p = 0.0022$ ). **m.** Graphical representation of isogenic chronic UVR model in two adult fibroblast lines. **n.** Fold change in expression of *COL1A1* and *COL1A2* in chronic UVR fibroblasts normalised to isogenic untreated cell lines, (two-sided Mann Whitney U ns: not significant). Error bars: standard error of the mean (bar). Box plots represent 25<sup>th</sup> to 75<sup>th</sup> percentiles with median, whiskers represent minimum and maximum values.



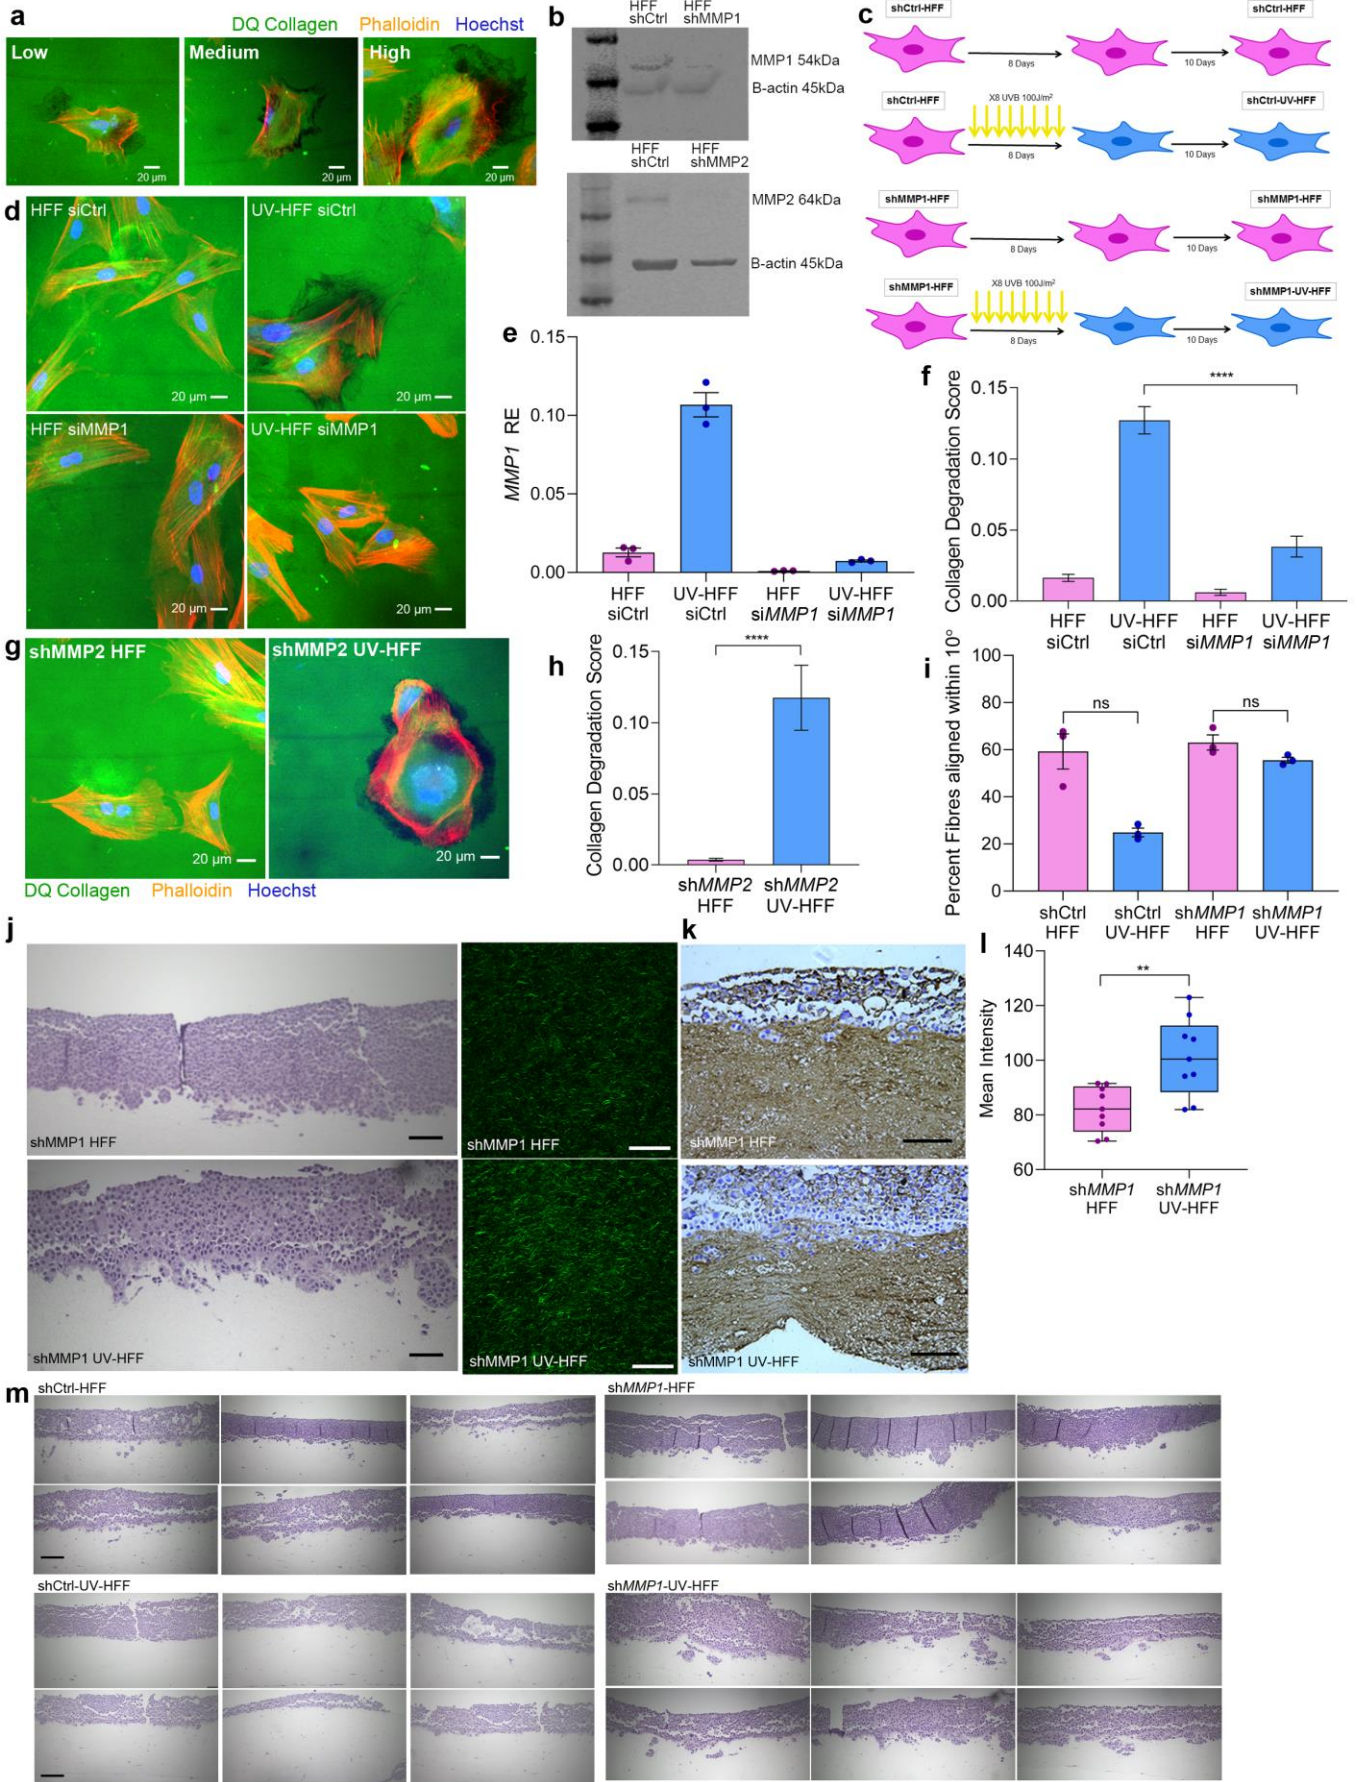

**Supplementary Figure 3. UVR damage to human dermal fibroblasts upregulate MMP1 but not COL1A1**

**a** Representative images of collagen degradation scores as outlined in methods. **b** Western blots validating knockdown of MMP1 and MMP2 in shRNA cell lines. **c** Graphical representation of isogenic chronic UVR model in shCtrl and shMMP1 HFF fibroblasts. **d** Representative images of collagen degradation in siCtrl-HFF, siCtrl-UV-HFF, siMMP1-HFF and siMMP1-UV-HFF fibroblasts. Green: intact DQ collagen; red: phalloidin; blue: Hoechst. Size bars: 20  $\mu$ m. **e** Validation of siRNA effect on MMP1 relative expression (RE) by qPCR in collagen degradation assay. **f** Quantification of collagen degradation of siCtrl-HFF and siMMP1-HFF (pink) and their isogenic chronic UVR cell lines siCtrl-UV-HFF and siMMP1-UV-HFF (blue), (two-sided Mann Whitney U \*\*\*\* $p < 0.0001$ ). **g** Representative images of collagen degradation in shMMP2-HFF, and shMMP2-UV-HFF fibroblasts. Green: intact DQ collagen; red: phalloidin; blue: Hoechst. Scale bars: 20  $\mu$ m. **h** Quantification of collagen degradation of shMMP2-HFF and their isogenic chronic UVR cell line shMMP2-UV-HFF (blue), (two-sided Mann Whitney U \*\*\*\* $p < 0.0001$ ). **i** Quantification of fibres within 10° of mode orientation in shCtrl-HFF, shCtrl-UV-HFF, shMMP1-HFF and shMMP1-UV-HFF derived ECM by fibronectin immunofluorescence (shCtrl-HFF vs shCtrl-UV-HFF  $p = 0.1$  ( $n = 3$ ), ns: not significant) **j** Representative H&E images of shMMP1-HFF and shMMP1-UV-HFF fibroblasts, scale bars: 75  $\mu$ m (left) and second harmonic generation (SHG) imaging of collagen fibres in organotypic dermal collagen shMMP1-HFF and shMMP1-UV-HFF constructs (right), scale bars: 50  $\mu$ m. **k** Fibronectin IHC staining in organotypic dermal collagen shMMP1-HFF and shMMP1-UV-HFF constructs, scale bars: 50  $\mu$ m. **l** Quantification of collagen from SGH images in shMMP1-HFF and shMMP1-UV-HFF (two-sided Mann Whitney U, \*\* $p = 0.004$ ). **m** Representatives H&E photomicrographs of shCtrl-HFF (four top left images), shCtrl-UV-HFF (four top right images), shMMP1-HFF (four bottom left images) and shMMP1-UV-HFF (four bottom right images) derived ECM constructs with invading melanoma cells, scale bars: 100  $\mu$ m, scale for all images equal. Error bars: standard error of the mean (bar). Box plots represent 25<sup>th</sup> to 75<sup>th</sup> percentiles with median, whiskers represent minimum and maximum values.



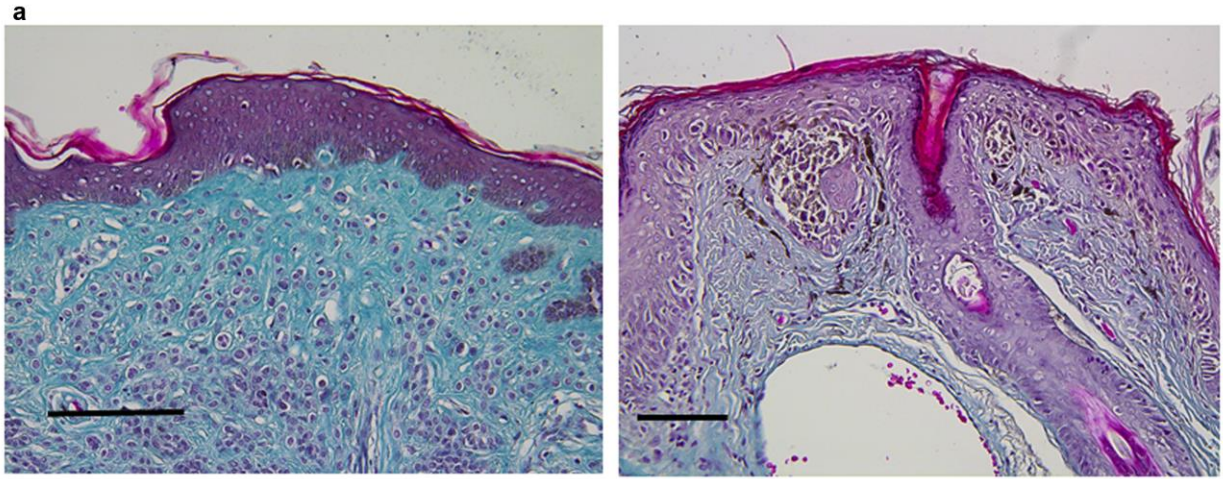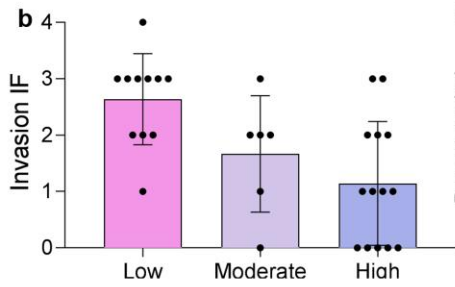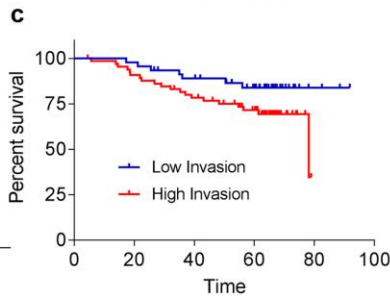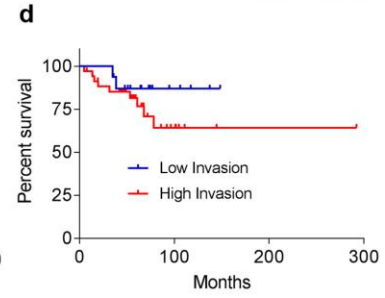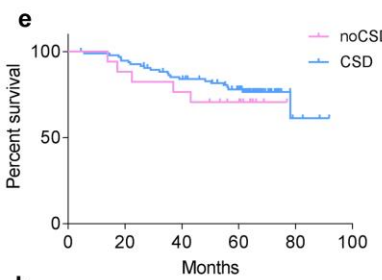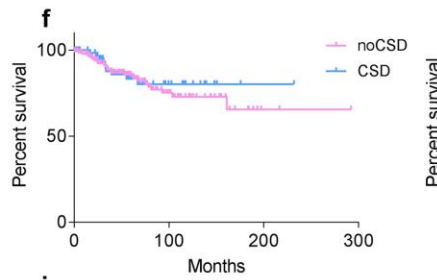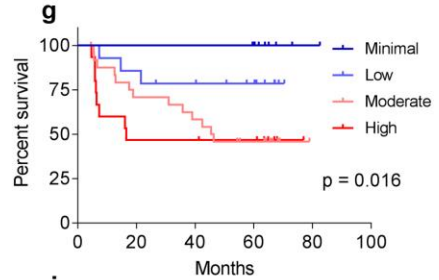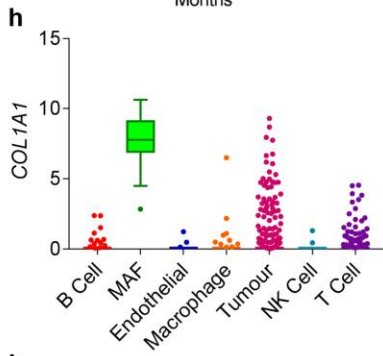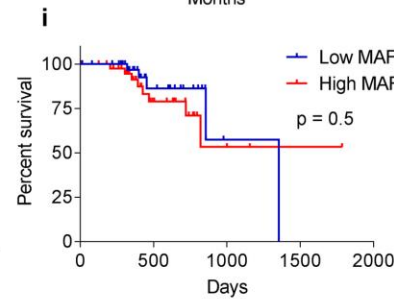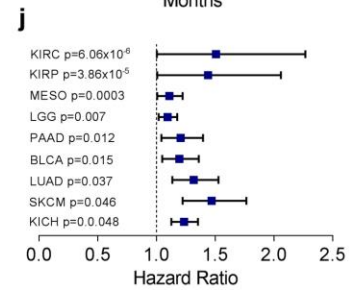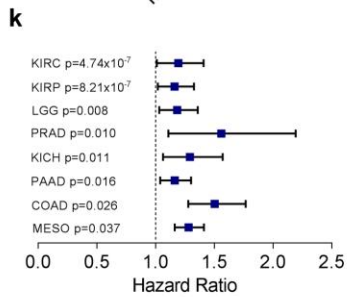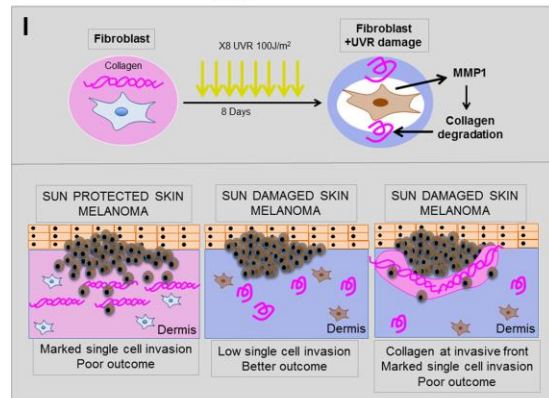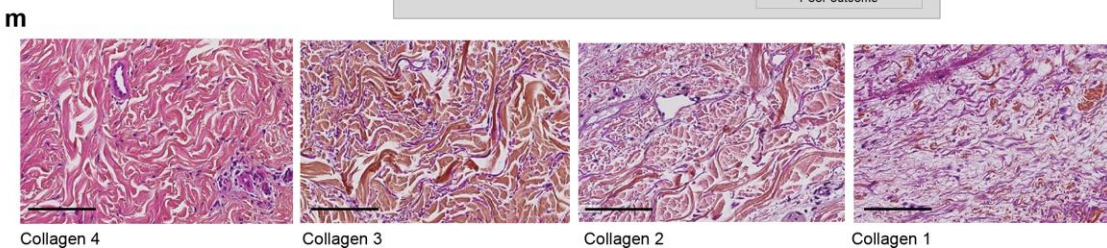

Collagen 4

Collagen 3

Collagen 2

Collagen 1

**Supplementary Figure 4. Collagen at the invasive front or primary invasive cutaneous melanoma drives melanoma invasion and poor outcome**

**a** Trichrome of Masson stain (blue) of collagen in sun protected skin (left, scale bar 200  $\mu\text{m}$ ) and sun damaged skin (right, scale bar 200  $\mu\text{m}$ ). **b** Correlation between ECM degradation of the adjacent dermis and invasive score of melanoma tumour cells at the invasive front (IF) in the A cohort. **c** Kaplan-Meier of melanoma specific survival (MSS) in prominent (high, red) and minimal (low, blue) melanoma invasion at the IF (C cohort, n=112). **d** Kaplan-Meier of melanoma specific survival (MSS) in prominent (high, red) and minimal (low, blue) melanoma invasion at the IF (B cohort, n=51). **e** Kaplan-Meier of MSS in melanoma invading in chronic sun damaged (CSD, blue) and no chronic sun damage (noCSD, pink) dermis (C cohort, n=113). **f** Kaplan-Meier of MSS in melanoma invading in CSD (blue) and noCSD (pink) dermis (B cohort, n=216). **g** Kaplan-Meier of progression free survival by collagen quantity at the IF (two-sided Log Rank test, C cohort, n=63). **h** *COL1A1* expression by cell type in metastatic melanoma single cell RNA-seq (MAF: melanoma associated fibroblast, NK cell: natural killer cell, Tirosh *et al.* Science 2016). **i** Kaplan-Meier of MSS by melanoma associated fibroblast (MAF) signature score without collagen genes in aged (>54) primary cutaneous melanoma cohort (two-sided Log Rank test, TCGA cohort, n=80). **j** Hazard ratio (centre) and 95% CI (bars) for OS, and PFS **k** Univariate Cox regression of *COL1A1* expression by cancer type in PANCAN TCGA in aged population ( $\geq 55$  years) (BLCA, Bladder urothelial carcinoma, COAD, Colon adenocarcinoma, KICH, Kidney chromophobe, KIRC, Kidney renal clear cell carcinoma, KIRP, Kidney renal papillary cell carcinoma, LGG, Brain lower grade glioma, LUAD, Lung adenocarcinoma, MESO, Mesothelioma, PAAD, Pancreatic adenocarcinoma PRAD, Prostate adenocarcinoma, SKCM, Skin Cutaneous Melanoma). **l** Graphic summary of study. Risk tables for all Kaplan-Meier analyses in Supplementary Data 2. Error bars: standard error of the mean (bar). **m** Representative photomicrographs of collagen scoring. 4: preservation of collagen fibres in the dermis. 3. Combination of preserved, normal collagen bundles (pink) intermixed with elastotic fibres of non-collagenous material (purple). 2. Combination of some collagen (pink) with purple elastotic fibres. Multiple fragmentation of collagen. 1. Scarce or absent collagen, substitution of the matrix by elastotic heterogeneous fibres (purple). Rare collagen fragments interspersed (pink). Scale bars: 100  $\mu\text{m}$ .

| Gene Set Name                                                         | # Genes in Gene Set (K) | Description                                                  | # Genes in Overlap (k) | k/K    | p-value  | FDR q-value |
|-----------------------------------------------------------------------|-------------------------|--------------------------------------------------------------|------------------------|--------|----------|-------------|
| REACTOME_EXTRACELLULAR_MATRIX_ORGANIZATION                            | 301                     | Extracellular matrix organization                            | 48                     | 0.1595 | 1.91E-27 | 2.86E-24    |
| REACTOME_COLLAGEN_FORMATION                                           | 90                      | Collagen formation                                           | 25                     | 0.2778 | 4.28E-21 | 3.21E-18    |
| REACTOME_DEVELOPMENTAL_BIOLOGY                                        | 1104                    | Developmental Biology                                        | 73                     | 0.0661 | 2.54E-17 | 1.27E-14    |
| REACTOME_HEMOSTASIS                                                   | 674                     | Hemostasis                                                   | 54                     | 0.0801 | 1.59E-16 | 5.96E-14    |
| REACTOME_ASSEMBLY_OF_COLLAGEN_FIBRILS_AND_OTHER_MULTIMERIC_STRUCTURES | 61                      | Assembly of collagen fibrils and other multimeric structures | 18                     | 0.2951 | 4.32E-16 | 1.29E-13    |
| REACTOME_AXON_GUIDANCE                                                | 554                     | Axon guidance                                                | 47                     | 0.0848 | 1.79E-15 | 4.47E-13    |
| REACTOME_COLLAGEN_BIOSYNTHESIS_AND_MODIFYING_ENZYMES                  | 67                      | Collagen biosynthesis and modifying enzymes                  | 18                     | 0.2687 | 2.73E-15 | 5.85E-13    |
| REACTOME_CELL_JUNCTION_ORGANIZATION                                   | 92                      | Cell junction organization                                   | 20                     | 0.2174 | 6.74E-15 | 1.26E-12    |
| REACTOME_CELL_CELL_COMMUNICATION                                      | 130                     | Cell-Cell communication                                      | 22                     | 0.1692 | 7.41E-14 | 1.23E-11    |
| REACTOME_INTEGRIN_CELL_SURFACE_INTERACTIONS                           | 85                      | Integrin cell surface interactions                           | 18                     | 0.2118 | 2.45E-13 | 3.68E-11    |

**Supplementary Table 1.** Top 10 Reactome pathways significantly enriched by genes differentially expressed by Signature 7 mutation count



| ID       | Gene                                                        | Expression Change |
|----------|-------------------------------------------------------------|-------------------|
| COL3A1   | collagen type III alpha 1 chain                             | DOWN              |
| COL5A1   | collagen type V alpha 1 chain                               | DOWN              |
| COL5A3   | collagen type V alpha 3 chain                               | DOWN              |
| COL4A1   | collagen type IV alpha 1 chain                              | DOWN              |
| COL4A2   | collagen type IV alpha 2 chain                              | DOWN              |
| COL1A1   | collagen type I alpha 1 chain                               | DOWN              |
| ITGA6    | integrin subunit alpha 6                                    | DOWN              |
| COL10A1  | collagen type X alpha 1 chain                               | DOWN              |
| COL8A1   | collagen type VIII alpha 1 chain                            | DOWN              |
| COL8A2   | collagen type VIII alpha 2 chain                            | DOWN              |
| COL11A1  | collagen type XI alpha 1 chain                              | DOWN              |
| COL15A1  | collagen type XV alpha 1 chain                              | DOWN              |
| PLEC     | plectin                                                     | DOWN              |
| CD151    | CD151 molecule (Raph blood group)                           | DOWN              |
| MMP3     | matrix metalloproteinase 3                                  | UP                |
| CTSL     | cathepsin L                                                 | UP                |
| LOX      | lysyl oxidase                                               | DOWN              |
| LOXL2    | lysyl oxidase like 2                                        | DOWN              |
| COL26A1  | collagen type XXVI alpha 1 chain                            | DOWN              |
| P4HB     | prolyl 4-hydroxylase subunit beta                           | DOWN              |
| SERPINH1 | serpin family H member 1                                    | DOWN              |
| COLGALT2 | collagen beta(1-O)galactosyltransferase 2                   | DOWN              |
| PLOD1    | procollagen-lysine,2-oxoglutarate 5-dioxygenase 1           | DOWN              |
| P3H2     | prolyl 3-hydroxylase 2                                      | DOWN              |
| COLGALT1 | collagen beta(1-O)galactosyltransferase 1                   | DOWN              |
| ITGB1    | integrin subunit beta 1                                     | DOWN              |
| DAG1     | dystroglycan 1                                              | DOWN              |
| ACTN1    | actinin alpha 1                                             | DOWN              |
| FN1      | fibronectin 1                                               | DOWN              |
| ITGB2    | integrin subunit beta 2                                     | DOWN              |
| MMP1     | matrix metalloproteinase 1                                  | UP                |
| SPARC    | secreted protein acidic and cysteine rich                   | DOWN              |
| APP      | amyloid beta precursor protein                              | UP                |
| HSPG2    | heparan sulfate proteoglycan 2                              | DOWN              |
| COMP     | cartilage oligomeric matrix protein                         | DOWN              |
| ICAM2    | intercellular adhesion molecule 2                           | DOWN              |
| ICAM5    | intercellular adhesion molecule 5                           | DOWN              |
| ITGA11   | integrin subunit alpha 11                                   | DOWN              |
| MMP8     | matrix metalloproteinase 8                                  | UP                |
| DCN      | decorin                                                     | UP                |
| ELN      | elastin                                                     | DOWN              |
| SCUBE3   | signal peptide, CUB domain and EGF like domain containing 3 | DOWN              |
| BGN      | biglycan                                                    | DOWN              |
| ASPN     | asporin                                                     | DOWN              |
| BMP2     | bone morphogenetic protein 2                                | UP                |
| EFEMP2   | EGF containing fibulin extracellular matrix protein 2       | DOWN              |
| BMP7     | bone morphogenetic protein 7                                | UP                |
| MFAP5    | microfibril associated protein 5                            | DOWN              |

**Supplementary Table 2.** Genes from Reactome Extracellular Matrix Organisation pathway differentially expressed by Signature 7 mutations

|                    |                   |                 |
|--------------------|-------------------|-----------------|
| Age median (range) | 69                | (34-75)         |
| Sex                | 6 Female          | 2 Male          |
| Anatomic site      | 7 Limbs and trunk | 1 Head and neck |

**Supplementary Table 3.** Patient fibroblasts

| Variable                          | Cohort A         |          | Cohort B        |          | Cohort C       |           |
|-----------------------------------|------------------|----------|-----------------|----------|----------------|-----------|
|                                   | (N=31)           |          | (N=222)         |          | (N=113)        |           |
| Age - median $\pm$ SD (range)     | 68.84 $\pm$ 7.87 | (57-91)  | 69.5 $\pm$ 9.15 | (55-96)  | 67 $\pm$ 8.86  | (55 - 88) |
| Sex                               |                  |          |                 |          |                |           |
| Male (%)                          | NA               |          | 140             | (63.06)  | 63             | (55.75)   |
| Female (%)                        | NA               |          | 82              | (36.94)  | 50             | (44.25)   |
| Breslow - median $\pm$ SD (range) | 1.72 $\pm$ 2.74  | (0.1-14) | 2.2 $\pm$ 2.20  | (1-13.5) | 2.5 $\pm$ 3.91 | (1 - 35)  |
| Site                              |                  |          |                 |          |                |           |
| Trunk (%)                         | NA               |          | 74              | (33.33)  | 53             | (46.90)   |
| Head&neck (%)                     | NA               |          | 86              | (38.74)  | 13             | (11.50)   |
| Upper limb (%)                    | NA               |          | 26              | (11.71)  | 19             | (16.81)   |
| Lower limb (%)                    | NA               |          | 36              | (16.22)  | 28             | (24.79)   |
| Solar elastosis                   |                  |          |                 |          |                |           |
| noCSD (%)                         | 17               | (54.8)   | 149             | (67.12)  | 17             | (15.04)   |
| CSD (%)                           | 14               | (45.2)   | 73              | (32.88)  | 96             | (82.22)   |

**Supplementary Table 4.** Clinical cohort details

| Variable                | Cox regression model |           |         |                  |           |         |                  |           |         |                  |           |         |
|-------------------------|----------------------|-----------|---------|------------------|-----------|---------|------------------|-----------|---------|------------------|-----------|---------|
|                         | Univariate           |           |         | Multivariate (a) |           |         | Multivariate (b) |           |         | Multivariate (c) |           |         |
|                         | HR                   | 95% CI    | P-value | HR               | 95% CI    | P-value | HR               | 95% CI    | P-value | HR               | 95% CI    | P-value |
| Age                     | 1.03                 | 1.00-1.06 | 0.03*   | 1.02             | 0.95-1.05 | 0.47    | 1.02             | 0.98-1.05 | 0.4     | 1.02             | 0.97-1.08 | 0.4     |
| Sex                     |                      |           |         |                  |           |         |                  |           |         |                  |           |         |
| Female                  | ref                  | ref       | ref     | ref              | ref       | ref     | ref              | ref       | ref     | ref              | ref       | ref     |
| Male                    | 2.04                 | 1.18-3.55 | 0.01*   | 1.43             | 0.48-3.77 | 0.49    | 2.67             | 1.22-5.88 | 0.01*   | 1.3              | 0.48-3.48 | 0.6     |
| Breslow                 | 1.06                 | 1.03-1.10 | 0.0004* | 1.03             | 0.87-1.33 | 0.77    | 1.09             | 1.04-1.15 | 0.0009* | 1                | 0.85-1.20 | 0.9     |
| CSD                     |                      |           |         |                  |           |         |                  |           |         |                  |           |         |
| noCSD                   | ref                  | ref       | ref     | ref              | ref       | ref     | -                | -         | -       | -                | -         | -       |
| CSD                     | 0.99                 | 0.61-1.65 | 0.36    | 0.73             | 0.16-1.57 | 0.57    |                  |           |         |                  |           |         |
| Invasion Binary         |                      |           |         |                  |           |         |                  |           |         |                  |           |         |
| Low                     | ref                  | ref       | ref     | ref              | ref       | ref     | ref              | ref       | ref     | -                | -         | -       |
| High                    | 2.3                  | 1.09-4.85 | 0.03*   | 1.17             | 0.39-5.41 | 0.81    | 2.76             | 1.21-6.27 | 0.02*   |                  |           |         |
| Invasive Front Collagen | 1.9                  | 1.15-3.15 | 0.01*   | 1.7              | 1.00-3.13 | 0.06    | -                | -         | -       | 1.85             | 1.11-3.1  | 0.019*  |

(a) multivariate analysis with all variables

(b) multivariate analysis with clinical variables significant in univariate and invasion score

(c) multivariate analysis with clinical variables significant in univariate and collagen scores

\*p<0.05

**Supplementary Table 5.** Cox regression of clinical and invasion variables
