# Supplementary material for: Ultraviolet light-induced collagen degradation inhibits melanoma invasion
Source: PubMed Central journal article supplement (PMC8115293; doi:10.1038/s41467-021-22953-z), 2021-05-12
Supplement: 41467_2021_22953_MOESM3_ESM.pdf [file 41467_2021_22953_MOESM3_ESM.pdf]

## **Description of Additional Supplementary Files**

File Name: Supplementary Data 1

Description: Differentially expressed genes by COSMIC signature 7 mutation count in health adult dermal fibroblasts

File Name: Supplementary Data 2

Description: Risk tables for all Kaplan Meier analyses
